# Supplementary material
Source: publisher figshare collection journal article supplement (https://asha.figshare.com/articles/dataset/_/24216576)
Supplement: Supplementary file 1 [file 1]

## **Supplemental Material S1. Survey questions.**

### **Clinician Questions**

How many years have you been practicing in your current profession?

What setting do you currently work in?

Early intervention; Preschool or school; Pediatric hospital; Inpatient acute care; Long-term acute care; Home health; Outpatient clinic; Rehab hospital; Skilled nursing; Private practice

Which best describes your work setting location?

Rural; Suburban; Urban

In which region of the USA do you currently practice?

Northeast; South; Midwest; West; I am not in the USA

What is the age of your caseload/clients? (Select all that apply)

Early intervention or pre school (0–3 years old); Pre-school or school-aged (4–18 years old); Adults (18 and older)

Over the last 5 years, what percent of your caseload is children with brain injury?

Did you receive education on brain injury in your graduate program?

Yes, a dedicated class; Yes, brain injury was covered as a part of a larger class; No

On average, how many Continuing Education Units (CEUs) do you take in brain injury each year?

Cognitive Fatigue is a "transient increase in mental exhaustion resulting from prolonged periods of cognitive activity" (Wylie & Flashman, 2017, p. 4) (5-point Likert Scale [*"not at all aware"* to *"very Aware"*])

How common is cognitive fatigue in children who are typically developing? (5-point Likert Scale [*"not at all common (very few children)"* to *"very common (most children)"*])

How significantly can cognitive fatigue impact children who are typically developing? (5-point Likert Scale [*"significant negative impact"* to *"significant positive impact"*])

How common is cognitive fatigue for children who have experienced a concussion or mild brain injury? (5-point Likert Scale [*"not at all common (very few children)"* to *"Very common (most children)"*])

How significantly does cognitive fatigue impact children who have experienced a concussion or mild brain injury? (5-point Likert Scale [*"significant negative impact"* to *"significant positive impact"*])

How does cognitive fatigue impact children who have experienced a moderate or severe brain injury? (5-point Likert Scale [*"significant negative impact"* to *"significant positive impact"*])

What factors worsen cognitive fatigue for children who have experienced a brain injury?

What factors lessen/relieve cognitive fatigue for children who have experienced a brain injury?

How comfortable are you in assessing cognitive fatigue and related challenges in children who have experienced a mild brain injury? Related challenges include areas of functioning within your scope of practice, such as academic speech or language skills for school-based speech pathologists or ability to complete activities of daily living for occupational therapists. (5-point Likert Scale [*"very uncomfortable"* to *"very comfortable"*])

How comfortable are you in assessing cognitive fatigue and related challenges in children who have experienced a moderate or severe brain injury? Related challenges include areas of functioning within your scope of practice, such as academic speech or language skills for school-based speech pathologists or ability to complete activities of daily living for occupational therapists. (5-point Likert Scale [*"very uncomfortable"* to *"very comfortable"*])

How comfortable are you in incorporating strategies to address cognitive fatigue and related challenges into your treatment plan for children who have experienced a mild brain injury? (5-point Likert Scale [*"very uncomfortable"* to *"very comfortable"*])

How comfortable are you in incorporating strategies to address cognitive fatigue and related challenges into your treatment plan for children who have experienced a moderate or severe brain injury? (5-point Likert Scale [*"very uncomfortable"* to *"very comfortable"*])

How much of a problem is cognitive fatigue in your ability to conduct assessment sessions of children who have experienced a mild brain injury? (5-point Likert Scale [*"very problematic"* to *"not problematic at all"*])

How much of a problem is cognitive fatigue in your ability to conduct treatment sessions of children who have experienced a moderate or severe brain injury? (5-point Likert Scale ["very problematic" to "not problematic at all"])

What strategies do you use to decrease the impact of cognitive fatigue for children who have experienced a brain injury?

What strategies do you recommend teachers to use to decrease the impact of cognitive fatigue for children who have experienced a brain injury?

What strategies do you recommend parents to use to decrease the impact of cognitive fatigue for children who have experienced a brain injury?

*Indicate whether you agree or disagree with the following statements: (5-point Likert Scale [strongly disagree, somewhat disagree, neither agree nor disagree, somewhat agree, strongly agree])*

It is within my scope of practice to assess the impacts of cognitive fatigue in children who have experienced a brain injury.

It is within my scope of practice to treat the impacts of cognitive fatigue in children who have experienced a brain injury.

It is within my scope of practice to provide recommendations, accommodations, or strategies related to cognitive fatigue for children who have experienced a brain injury.

It would be helpful to my clinical practice to know more about the assessment of cognitive fatigue, as related to my scope of practice, in children who have experienced a brain injury.

It would be helpful to my clinical practice to know more about the treatment of cognitive fatigue, as related to my scope of practice, in children who have experienced a brain injury.

Did you learn about cognitive fatigue after brain injury during your graduate school? (check all that apply)

Yes, as related to childhood brain injury; Yes, as related to adult brain injury; No, but in other populations; No

Have you learned about cognitive fatigue after brain injury during any of your continuing education units (CEUs)? (check all that apply)

Yes, as related to childhood brain injury; Yes, as related to adult brain injury; No, but in other populations; No

How many CEU courses discussed cognitive fatigue after childhood brain injury?

Estimate how many total minutes of all CEUs discussed cognitive fatigue after childhood brain injury?

How many CEU courses discussed cognitive fatigue after adult brain injury?

Estimate how many total minutes of all CEUs discussed cognitive fatigue after adult brain injury?

## Parent Questions

What is your age (years)?

What is your race/ethnicity?

Hispanic; White non-Hispanic; Black non-Hispanic; Asian; Multiracial; Other

What is your highest level of education?<br>

GED or high school equivalent; High school; Bachelor's; Graduate; Professional; Advanced

What is your estimated annual household income?

Do you work with children who have brain injuries in your line of work?

Yes; No

If yes, select:

Clinician/therapist (e.g., speech-language pathologist, athletic trainer); Physician; Teacher; Criminal justice (e.g., police, judge); Other

Describe where you live:

Rural; Suburban; Urban

What region of the country do you currently live in?

Northeast; South; Midwest; West

How old is your child? (years)

What was the severity of your child's brain injury:

Mild/concussion; Moderate; Severe

How did your child sustain their brain injury?

Motor vehicle accident; Fall; Sports; Hit by object; Other (describe)

Does your child currently receive special education or 504 plan services at school?

Special education (like an IEP [Individualized Education Plan]); 504 Plan; No

What, if any, accommodations does your child receive at school? (check all that apply)

Modified schedule; Breaks; Decrease workload; Extended time for testing; None;

Other

If other, please describe:

What, if any, therapy services does your child receive? (check all that apply)

Speech therapy (school-based); Occupational therapy (school-based); Physical therapy (school-based); Mental health/counseling (school-based); Orientation/mobility (school-based); Speech therapy (outpatient); Occupational therapy (outpatient);

Physical therapy outpatient); Mental health/counseling (outpatient); Orientation/mobility (outpatient); Other (please describe)

Please rate your knowledge on brain injury before your child experienced their brain injury (5-point Likert Scale [*"not at all knowledgeable"* to *"highly knowledgeable"*])

Please rate your knowledge on brain injury now, after your child experienced their brain injury (5-point Likert Scale [*"not at all knowledgeable"* to *"highly knowledgeable"*])

Cognitive Fatigue is a "transient increase in mental exhaustion resulting from prolonged periods of cognitive activity" (Wylie & Flashman, 2017, p. 4) (5-point Likert Scale [*"not at all aware"* to *"very aware"*])

How common is cognitive fatigue for children who have experienced a concussion or mild brain injury? (5-point Likert Scale [*"not at all common"* to *"very common"*])

How common is cognitive fatigue for children who have experienced a moderate or severe brain injury? (5-point Likert Scale [*"not at all common"* to *"very common"*])

How significantly does cognitive fatigue impact your child? (5-point Likert Scale [*"significant negative impact"* to *"significant positive impact"*])

For the next questions, consider how cognitive fatigue impacts your child in the following areas: (5-point Likert Scale [*"significant negative impact"* to *"significant positive impact"*])

Academic engagement/performance?

Family engagement?

Friendships/Social Relationships?

Physical Health/Functioning?

Quality of Life?

What factors worsen cognitive fatigue for your child?

What factors lessen/relieve cognitive fatigue for your child?

How do you, as a parent, help reduce cognitive fatigue or the impacts of cognitive fatigue for your child?

How comfortable are you in addressing cognitive fatigue and related challenges in your child? You might address cognitive fatigue in a variety of ways, such as having your child take breaks or go to bed earlier than their peers. Related challenges might include your child's ability to go to school or hang out with friends. (5-point Likert Scale [*very uncomfortable* to *very comfortable*])

What accommodations, if any, does your child receive at school that could lessen/relieve their cognitive fatigue? (please list)

How well does your child's school address (e.g., treat or accommodate for) your child's brain injury? (5-point Likert Scale [*extremely poorly* to *extremely well*])

How well does your child's school address (e.g., treat or accommodate for) your child's cognitive fatigue? (5-point Likert Scale [*extremely poorly* to *extremely well*])

How much of a problem is cognitive fatigue in your child's ability to participate at home/in your family? (5-point Likert Scale [*very problematic* to *not problematic at all*])

What strategies do you recommend teachers and therapists use to decrease the impact of cognitive fatigue for children who have experienced a brain injury?

*Indicate whether you agree or disagree with the following statements: (5-point Likert Scale ["strongly disagree" to "strongly agree"])*

It would be helpful to me and other parents to receive more information about cognitive fatigue and its impacts after childhood brain injury.

It would be helpful for teachers and therapists to know more about cognitive fatigue and its impacts after childhood brain injury.

My child is aware of their cognitive fatigue.

My child is bothered by their cognitive fatigue.

My child knows how their cognitive fatigue impacts their daily life.

My child knows strategies to lessen or reduce their cognitive fatigue.

My child can independently use strategies in their daily life to lessen or reduce their cognitive fatigue.
